# Supplementary material for: Worldwide genetic variation of the IGHV and TRBV immune receptor gene families in humans
Source: PubMed Central journal article supplement (PMC6391684; doi:10.26508/lsa.201800221), 2019-02-26
Supplement: LSA-2018-00221_TableS2.pdf [file LSA-2018-00221_TableS2.pdf]

| Allele name                       | Freq. |
|-----------------------------------|-------|
| TRBV10-1*01                       | 0.634 |
| TRBV10-1*02_gt234E_ (P)           | 0.239 |
| TRBV10-1*02                       | 0.127 |
| TRBV10-2*01                       | 0.894 |
| TRBV10-2*01_tc191YY (T)           | 0.106 |
| TRBV10-3*01                       | 0.39  |
| TRBV10-3*02                       | 0.462 |
| TRBV10-3*03                       | 0.124 |
| TRBV10-3*01_ga118GE (T)           | 0.024 |
| TRBV11-1*01                       | 0.94  |
| TRBV11-1*01_ag85HR_ct98YY_ag142QR | 0.06  |
| TRBV11-2*01                       | 0.662 |
| TRBV11-2*03                       | 0.338 |
| TRBV11-3*01                       | 0.885 |
| TRBV11-3*02                       | 0.115 |
| TRBV12-5*01                       | 0.551 |
| TRBV12-5*01_cg27HD                | 0.417 |
| TRBV12-5*01_ga154RQ               | 0.032 |
| TRBV13*01                         | 0.977 |
| TRBV13*01_ct78PS (T)              | 0.023 |
| TRBV14*01                         | 0.866 |
| TRBV14*02                         | 0.134 |
| TRBV15*02                         | 0.977 |
| TRBV15*01                         | 0.023 |
| TRBV16*01                         | 0.976 |
| TRBV16*02                         | 0.024 |
| TRBV18*01                         | 0.953 |
| TRBV18*01_ag75MV                  | 0.047 |
| TRBV19*01                         | 0.875 |
| TRBV19*01_ag23PP (T)              | 0.125 |
| TRBV2*01                          | 1.0   |
| TRBV20-1*01                       | 0.444 |
| TRBV20-1*02                       | 0.422 |
| TRBV20-1*05                       | 0.125 |
| TRBV20-1*02_ga227LL               | 0.009 |
| TRBV27*01                         | 1.0   |
| TRBV28*01                         | 1.0   |
| TRBV29-1*01                       | 0.944 |
| TRBV29-1*01_ac246ML (T)           | 0.056 |
| TRBV3-1*01                        | 1.0   |
| TRBV30*01                         | 0.707 |
| TRBV30*02                         | 0.211 |
| TRBV30*01_ct108R_ct204PS (T)      | 0.02  |
| TRBV30*02_ct108R_ct204PS (P,T)    | 0.02  |
| TRBV30*01_ga33VM (T)              | 0.014 |
| TRBV30*04                         | 0.027 |
| TRBV4-1*01                        | 0.991 |
| TRBV4-1*01_cg181PR                | 0.009 |
| TRBV5-1*01                        | 1.0   |

|                                      |       |
|--------------------------------------|-------|
| TRBV5-4*01                           | 0.991 |
| TRBV5-4*01_tg213YD (T)               | 0.009 |
| TRBV5-5*02                           | 0.67  |
| TRBV5-5*01                           | 0.33  |
| TRBV5-6*01                           | 0.948 |
| TRBV5-6*01_ta205FY_ct236NN           | 0.019 |
| TRBV5-6*01_ta205FY                   | 0.014 |
| TRBV5-6*01_tg244LW                   | 0.009 |
| TRBV5-6*01_gt118GV                   | 0.009 |
| TRBV5-8*01_ct236NN (T)               | 0.09  |
| TRBV5-8*01_ct55AV (T)                | 0.142 |
| TRBV5-8*01                           | 0.711 |
| TRBV5-8*01_ct55AV_ct236NN (T)        | 0.057 |
| TRBV6-1*01                           | 0.991 |
| TRBV6-1*01_ag183ND                   | 0.009 |
| TRBV6-4*01                           | 0.869 |
| TRBV6-4*02                           | 0.085 |
| TRBV6-4*02_ga49RQ                    | 0.019 |
| TRBV6-4*02_gc49RP                    | 0.019 |
| TRBV6-4*02_ac51SR                    | 0.009 |
| TRBV6-5*01                           | 1.0   |
| TRBV6-6*01                           | 0.64  |
| TRBV6-6*02                           | 0.327 |
| TRBV6-6*03_gt216DY                   | 0.009 |
| TRBV6-6*01_ga31RH (T)                | 0.014 |
| TRBV6-6*01_ca278SR (T)               | 0.009 |
| TRBV6-8*01                           | 0.962 |
| TRBV6-8*01_ag250QR                   | 0.038 |
| TRBV6-9*01                           | 0.787 |
| TRBV6-9*01_ag263VV                   | 0.213 |
| TRBV7-2*02                           | 0.584 |
| TRBV7-2*01                           | 0.416 |
| TRBV7-3*01                           | 0.933 |
| TRBV7-3*01_gt255DY (T)               | 0.067 |
| TRBV7-4*01                           | 0.954 |
| TRBV7-4*01_ga214RK                   | 0.037 |
| TRBV7-4*01_ct240RC                   | 0.009 |
| TRBV7-6*01                           | 1.0   |
| TRBV7-7*01                           | 1.0   |
| TRBV7-8*01                           | 0.967 |
| TRBV7-8*02                           | 0.024 |
| TRBV7-8*01_tc258SP (T)               | 0.009 |
| TRBV7-9*01                           | 0.226 |
| TRBV7-9*03                           | 0.747 |
| TRBV7-9*03_ga67CY_ct105R_ag111TA (P) | 0.028 |
| TRBV9*01                             | 0.894 |
| TRBV9*02                             | 0.106 |
