# Supplementary material for: Worldwide genetic variation of the IGHV and TRBV immune receptor gene families in humans
Source: PubMed Central journal article supplement (PMC6391684; doi:10.26508/lsa.201800221), 2019-02-26
Supplement: LSA-2018-00221_TableS4.pdf [file LSA-2018-00221_TableS4.pdf]

| Variant name               | Variant type | Region             | No. of haplotypes | Regional freq | Global freq |
|----------------------------|--------------|--------------------|-------------------|---------------|-------------|
| IGHV1-18_g168              | SNV          | Africa             | 2                 | 0.07          | 0.01        |
| IGHV1-58_t57               | SNV          | Africa             | 8                 | 0.29          | 0.04        |
| IGHV2-26_a118              | SNV          | Africa             | 2                 | 0.07          | 0.01        |
| IGHV3-72_c170              | SNV          | Africa             | 2                 | 0.07          | 0.01        |
| IGHV3-74_t20               | SNV          | Africa             | 3                 | 0.11          | 0.01        |
| IGHV1-18*01_ag168ND        | Allele       | Africa             | 2                 | 0.07          | 0.01        |
| IGHV1-58*02_gt57VF         | Allele       | Africa             | 8                 | 0.29          | 0.04        |
| IGHV3-72*01_tc170SS        | Allele       | Africa             | 2                 | 0.07          | 0.01        |
| IGHV3-74*02                | Allele       | Africa             | 3                 | 0.12          | 0.01        |
| TRBV13_t78                 | SNV          | CentralAsiaSiberia | 5                 | 0.11          | 0.02        |
| TRBV20-1_a227              | SNV          | Africa             | 2                 | 0.08          | 0.01        |
| TRBV30_a33                 | SNV          | CentralAsiaSiberia | 2                 | 0.08          | 0.01        |
| TRBV4-1_g181               | SNV          | Africa             | 2                 | 0.07          | 0.01        |
| TRBV5-4_g213               | SNV          | Africa             | 2                 | 0.08          | 0.01        |
| TRBV5-6_t118               | SNV          | SouthAsia          | 2                 | 0.04          | 0.01        |
| TRBV5-6_a205               | SNV          | Africa             | 8                 | 0.29          | 0.04        |
| TRBV5-6_t236               | SNV          | Africa             | 4                 | 0.14          | 0.02        |
| TRBV6-1_g183               | SNV          | Africa             | 2                 | 0.08          | 0.01        |
| TRBV6-6_a31                | SNV          | Africa             | 3                 | 0.12          | 0.01        |
| TRBV6-6_t216               | SNV          | Africa             | 2                 | 0.08          | 0.01        |
| TRBV6-6_a278               | SNV          | SouthAsia          | 2                 | 0.04          | 0.01        |
| TRBV6-8_g250               | SNV          | Africa             | 8                 | 0.42          | 0.04        |
| TRBV7-4_t240               | SNV          | Africa             | 2                 | 0.07          | 0.01        |
| TRBV13*01_ct78PS (T)       | Allele       | CentralAsiaSiberia | 5                 | 0.11          | 0.02        |
| TRBV20-1*02_ga227LL        | Allele       | Africa             | 2                 | 0.08          | 0.01        |
| TRBV30*01_ga33VM (T)       | Allele       | CentralAsiaSiberia | 2                 | 0.08          | 0.01        |
| TRBV4-1*01_cg181PR         | Allele       | Africa             | 2                 | 0.07          | 0.01        |
| TRBV5-4*01_tg213YD (T)     | Allele       | Africa             | 2                 | 0.08          | 0.01        |
| TRBV5-6*01_ta205FY_ct236NN | Allele       | Africa             | 4                 | 0.15          | 0.02        |
| TRBV5-6*01_ta205FY         | Allele       | Africa             | 3                 | 0.11          | 0.01        |
| TRBV5-6*01_gt118GV         | Allele       | SouthAsia          | 2                 | 0.04          | 0.01        |
| TRBV6-1*01_ag183ND         | Allele       | Africa             | 2                 | 0.08          | 0.01        |
| TRBV6-6*03_gt216DY         | Allele       | Africa             | 2                 | 0.08          | 0.01        |
| TRBV6-6*01_ga31RH (T)      | Allele       | Africa             | 3                 | 0.12          | 0.01        |
| TRBV6-6*01_ca278SR (T)     | Allele       | SouthAsia          | 2                 | 0.04          | 0.01        |
| TRBV6-8*01_ag250QR         | Allele       | Africa             | 8                 | 0.42          | 0.04        |
| TRBV7-4*01_ct240RC         | Allele       | Africa             | 2                 | 0.07          | 0.01        |
